# Supplementary material for: FGFR1 regulates proliferation and metastasis by targeting CCND1 in FGFR1 amplified lung cancer
Source: Cell Adh Migr. 2020 May 18;14(1):82–95. doi: 10.1080/19336918.2020.1766308 (PMC7250189; doi:10.1080/19336918.2020.1766308)
Supplement: Supplemental Material [file kcam-14-01-1766308-s001.xlsx]

## Sheet: Sheet1
supplementary table 1
Sample	Source	Locus names (allele 1, allele 2)									Match percent
		D5S818	D13S317	D7S820	D16S539	VWA	TH01	AMEL	TPOX	CSF1PO
H1581	Our cells	12,12	11,11	9,11	9,9	15,16	6,7	X,X	8,9	12,12	0.94
H1581	DSMZ	12,12	11,11	9,11	9,9	15,16	6,7	X,Y	8,9	12,12
HCC95	Our cells	11,12	11,12	10,10	9,9	14,17	8,9	X,X	8,11	12,12	1
HCC95	DSMZ	11.12	11.12	10,10	9,9	14,17	8,9	X,X	8,11	12,12
